# Supplementary material
Source: PubMed Central journal article supplement (PMC8353930)
Supplement: 41578_2021_358_MOESM1_ESM.pdf [file 41578_2021_358_MOESM1_ESM.pdf]

---

**Supplementary information**

---

**Lipid nanoparticles for mRNA delivery**

---

In the format provided by the  
authors and unedited

## 2021 Competing Interests Disclosure

From FY 2015 to the present, Dr. Robert Langer receives licensing fees (to patents in which he was an inventor on) from, invested in, consults (or was on Scientific Advisory Boards or Boards of Directors) for, lectured (and received a fee), or conducts sponsored research at MIT for which he was not paid for the following entities:

1. 7th Sense;
2. Abpro Labs;
3. Abpro-Korea;
4. Acorda (Formerly Civitas Therapeutics);
5. Aleph Farms;
6. Alivio Therapeutics;
7. Alkermes;
8. Allevi;
9. Alnylam Pharmaceuticals, Inc;
10. Apotex;
11. Arcadia Biosciences, Inc;
12. Arsenal Medical;
13. Artificial Cell Technology, Inc;
14. Avalon-Globocare;
15. BASF Corporation;
16. Bayer;
17. Bilayer Therapeutics
18. Biogen;
19. BioInnovation Institute (Novo Nordisk Founden);
20. Blackstone (Formerly Clarus);
21. Boston Children's Hospital;
22. Celero;
23. Cellink
24. Cellomics Technology, Llc;
25. Cellular Biomedical;
26. Charles River Laboratories, Inc.;
27. Clontech Laboratories;
28. Combined Therapeutics ("CTx");
29. Conference Forum;
30. Cornell University;
31. Crispr Therapeutics Ag;
32. Crown Bioscience Inc.;
33. Cygnal Therapeutics, Inc.;
34. Daré Biosciences (Formerly Microchips Biotech, Juniper Pharmaceuticals, and Columbia Laboratories);
35. Daros, Inc.
36. DeepBiome;
37. Dewpoint Therapeutics;
38. Dispendix
39. Domain;
40. Eagle Pharmaceuticals;
41. Earli;
42. Edigene Biotechnology, Inc.;
43. Editas Medicine, Inc.;
44. Eli Lilly;
45. Eisai Inc.;
46. Entrega;
47. EpiBone
48. Establishment Labs, SA.
49. Everlywell;
50. Evox Therapeutics, Ltd.;
51. Flagship Pioneering;
52. Frequency Therapeutics, Inc.;
53. GeneLeap Biotech
54. Genemedicine Co Lmtd;
55. GenScript USA Inc;
56. GENUV;
57. Glaxosmithkline Llc;
58. Glycobia;
59. Glympse Bio;
60. Goldman Sachs
61. Greenlight Biosciences;
62. HCR (HealthCare Royalty Partners);
63. Hopewell Therapeutics;
64. Horizon Discovery Group Plc;
65. Humacyte, Inc.;

## 2021 Competing Interests Disclosure

From FY 2015 to the present, Dr. Robert Langer receives licensing fees (to patents in which he was an inventor on) from, invested in, consults (or was on Scientific Advisory Boards or Boards of Directors) for, lectured (and received a fee), or conducts sponsored research at MIT for which he was not paid for the following entities:

66. IBEX Pharmaceuticals, Inc.;
67. ImmuneXcite Inc.;
68. Indivor;
69. Institute of Immunology Co. Ltd;
70. Integrated Dna Technologies, Inc.;
71. InVivo Therapeutics;
72. IxBio;
73. J.R. Simplot Company;
74. Jnana Therapeutics;
75. Kala Pharmaceuticals;
76. Kallyope, Inc.;
77. Kensa;
78. Kodikaz Therapeutics
79. Ksq Therapeutics, Inc.;
80. Landsdowne Labs;
81. LikeMinds;
82. Lonza;
83. Luminopia, Inc.;
84. Luye (Shandong luye);
85. Lyndra Therapeutics;
86. Lyra Therapeutics (Formerly "480 Biomedical");
87. McGovern Institute;
88. Medikinetics Co., Ltd.;
89. Merck;
90. MGH Ragon Institute;
91. Micelle;
92. Moderna Therapeutics;
93. Momenta;
94. Muse Biotechnologies Inc.
95. Mylan;
96. N2Tech;
97. Nanobiosym;
98. Nanobiotix;
99. Newbridge Ventures LLC;
100. Noveome Biotherapeutics, Inc.;
101. Novo Nordisk;
102. Particles for Humanity;
103. Pfizer, Inc.;
104. Pioneer Hi-Bred International, Inc.;
105. Placon Therapeutics
106. Polaris Partners;
107. Portal Instruments;
108. Preceres, Llc (Acquired by Monsanto);
109. PrognomiQ Inc.;
110. Pulmatrix;
111. PureTech;
112. Quris
113. ReLive;
114. Reprocell Usa, Inc. (Formerly Stemgent);
115. Rubius Therapeutics;
116. Secant Medical, Inc.;
117. Seer, Inc.;
118. Selecta Biosciences;
119. Senses LLC;
120. Setsuro Tech Inc.;
121. Seventh Sense Biosystems, Inc.;
122. Shenzhen Rice Life Technology, Ltd;
123. Shire Ag;
124. Sigilon;
125. Sigma Aldrich Co. Llc;
126. Sio2;
127. Ske S.R.L.;
128. Soil Culture Solutions Llc (DbA Soilcea);
129. SQZ Biotechnologies;
130. StemBioSys, Inc.;
131. SuonoBio;

## 2021 Competing Interests Disclosure

From FY 2015 to the present, Dr. Robert Langer receives licensing fees (to patents in which he was an inventor on) from, invested in, consults (or was on Scientific Advisory Boards or Boards of Directors) for, lectured (and received a fee), or conducts sponsored research at MIT for which he was not paid for the following entities:

132. T2 Biosystems;
133. Taconic Biosciences, Inc. (formerly Taconic Farms);
134. TARA;
135. Tarveda Therapeutics;
136. Teal Bio
137. Tesio Pharmaceuticals
138. Third Rock Ventures;
139. Tiba Biotech LLC;
140. TissiuM (formerly "Gecko");
141. Transgenic Inc.;
142. Translate Bio (Formerly Rana Therapeutics, Inc.);
143. Trilink Biotechnologies, Inc.;
144. Unilever (Living Proof);
145. VasoRX;
146. Verseau Therapeutics, Inc.;
147. Vitakey;
148. Vivtex Corporation;
149. Whitehead Institute;
150. Wiki Foods;
151. Yz Biosciences (Guangzhou) Inc.;
152. Zenomics;
